# Supplementary material for: FTY720 inhibits mesothelioma growth in vitro and in a syngeneic mouse model
Source: PubMed Central journal article supplement (PMC5353897; doi:10.1186/s12967-017-1158-z), 2017-03-15
Supplement: 12967_2017_1158_MOESM1_ESM.pdf [file 12967_2017_1158_MOESM1_ESM.pdf]

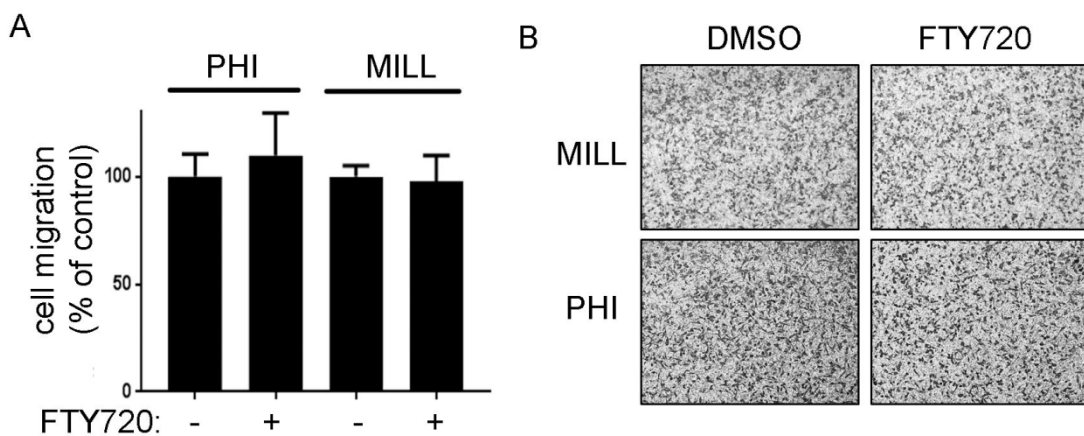

**Figure S1. FTY720 does not affect MM cell migration. (A)** MILL and PHI cells were treated with FTY720 (2  $\mu$ M) or DMSO and subjected to the migration assay. Graph shows mean percentages of the migrated cells in treated vs. untreated samples, counted from two independent experiments. **(B)** Representative photomicrographs showing HEMA 3 staining of MILL and PHI cells migrated and adhered to the lower surface of insert membrane (original magnification 100x).
