# Supplementary material for: FTY720 inhibits mesothelioma growth in vitro and in a syngeneic mouse model
Source: PubMed Central journal article supplement (PMC5353897; doi:10.1186/s12967-017-1158-z), 2017-03-15
Supplement: 12967_2017_1158_MOESM2_ESM.pdf [file 12967_2017_1158_MOESM2_ESM.pdf]

A

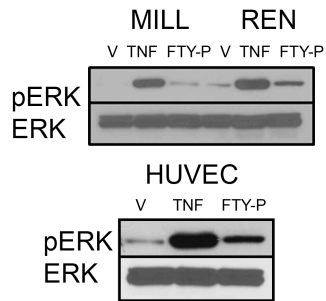

B

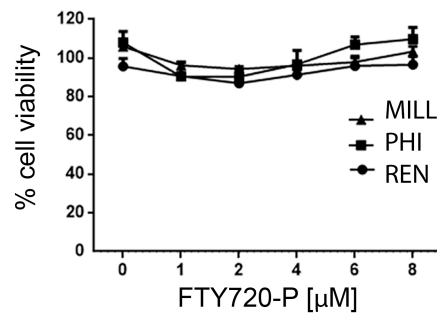

**Figure S2. FTY720-P does not affect MM cell survival. (A)** Phosphorylation of ERK1/2 in REN, MILL and HUVEC after stimulation with 1  $\mu$ M FTY720-P (5 min) was evaluated by immunoblot analysis, as a positive control of drug activity. TNF $\alpha$  (1 ng/ml, 30 min) stimulation was used as a positive control for ERK phosphorylation; total ERK protein levels were detected as loading control. **(B)** MILL, REN and PHI cells were treated with increasing concentrations of phosphorylated FTY720 (FTY720-P) and cell viability was assessed by Alamar Blue assay, upon 48h treatment.
