# Supplementary material for: FTY720 inhibits mesothelioma growth in vitro and in a syngeneic mouse model
Source: PubMed Central journal article supplement (PMC5353897; doi:10.1186/s12967-017-1158-z), 2017-03-15
Supplement: 12967_2017_1158_MOESM5_ESM.pdf [file 12967_2017_1158_MOESM5_ESM.pdf]

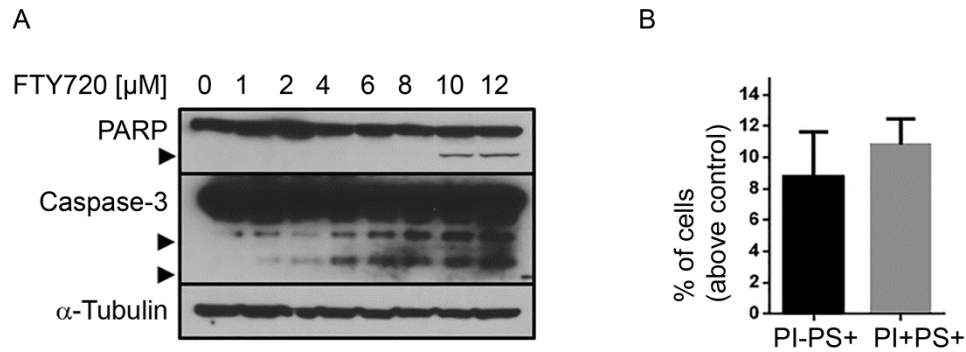

**Figure S5. FTY720 induces apoptosis in MM cells. (A)** Dose-dependent effect of FTY720 on caspase-3 and PARP cleavage in MILL cells upon 12 hr of treatment was assessed by immunoblot analysis. Arrowheads indicate cleaved caspase-3 and PARP fragments.  $\alpha$ -tubulin was detected as loading control. **(B)** Flow cytometry analysis of Annexin V positive, PI negative (PI-PS+) and Annexin V and PI positive (PI+PS+) REN cells after 16 hr of treatment with 6  $\mu$ M FTY720. Bars represent mean and SD of percentage differences between cell counts for FTY720-treated and untreated samples.
