# Supplementary material for: FTY720 inhibits mesothelioma growth in vitro and in a syngeneic mouse model
Source: PubMed Central journal article supplement (PMC5353897; doi:10.1186/s12967-017-1158-z), 2017-03-15
Supplement: 12967_2017_1158_MOESM6_ESM.pdf [file 12967_2017_1158_MOESM6_ESM.pdf]

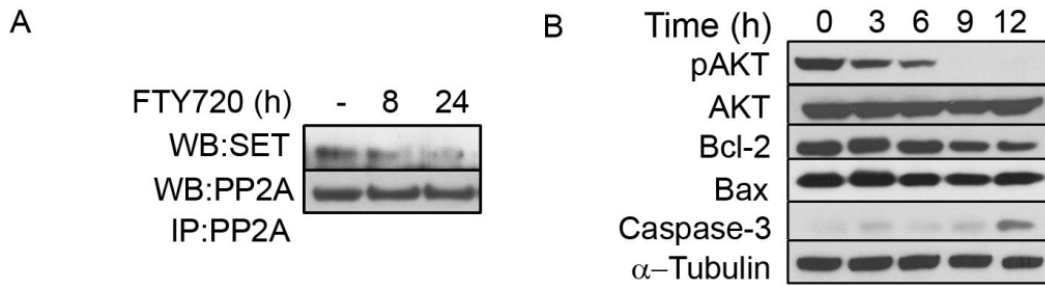

**Figure S6. FTY720 displaces PP2A inhibitor protein –SET, reduces pAKT and Bcl2, and activates apoptosis in AB1 mouse cells. (A)** PP2A was immunoprecipitated from AB1 cell cultures untreated or treated with vehicle or 6  $\mu$ M FTY720 for 8 hr and 24 hr. Immunoprecipitates were probed with anti-SET antibody (upper panel) and anti-PP2A antibody, as a loading control (lower panel). **(B)** AB1 cells were treated with vehicle or 6  $\mu$ M FTY720 for 3, 6, 9 or 12 hr and the levels of phosphorylated AKT (Ser<sup>473</sup>), AKT, total Bcl-2, Bax and cleaved caspase-3 proteins were assessed by immunoblot analysis at indicated time-points. Levels of  $\alpha$ -tubulin were detected as loading control.
