# Supplementary material for: FTY720 inhibits mesothelioma growth in vitro and in a syngeneic mouse model
Source: J Transl Med. 2017 Mar 15;15:58. doi: 10.1186/s12967-017-1158-z (PMC5353897; doi:10.1186/s12967-017-1158-z)
Supplement: Supplementary file 3 — Additional file 3: Figure S3. FTY720 does not alter SET and CIP2A protein expression levels in MM cells. [file 12967_2017_1158_MOESM3_ESM.pdf]

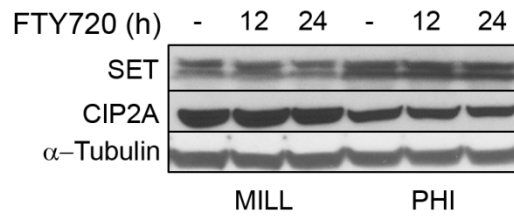

**Figure S3. FTY720 does not alter SET and CIP2A protein expression levels in MM cells.** Representative western blot analysis of SET and CIP2A protein expression levels in MILL and PHI cells, upon 12 hr and 24 hr treatment with 6  $\mu$ M FTY720.
